# Supplementary material for: Tunable 1,2,3-triazole-N-oxides towards high energy density materials: theoretical insight into structure–property correlations
Source: Royal Society of Chemistry journal article supplement (doi:10.1039/d2nj01002j), 2022-01-01
Supplement: d2nj01002j1.pdf [file d2nj01002j1.pdf]

## Supporting Information

### Tunable 1,2,3-triazole-N-Oxides towards high energy density materials: theoretical insight into structure-property correlations

Yue Liu<sup>1</sup>, Lishan Gong<sup>1</sup>, Xiaoyi Yi<sup>1</sup>, Piao He<sup>1\*</sup>, Jianguo Zhang<sup>2</sup>

<sup>1</sup> College of Chemistry and Chemical Engineering, Central South University, Changsha 410083, Hunan, P. R. China

<sup>2</sup> State Key Laboratory of Explosion Science and Technology, Beijing Institute of Technology, Beijing 100081 P. R. China

#### Table of Contents

1. Optimized parameters
2. HOMO-LUMO orbitals and energy gap
3. Molecular electrostatic potential (ESP)
4. Thermodynamic parameters
5. Detonation parameters
6. References

#### 1. Optimized parameters

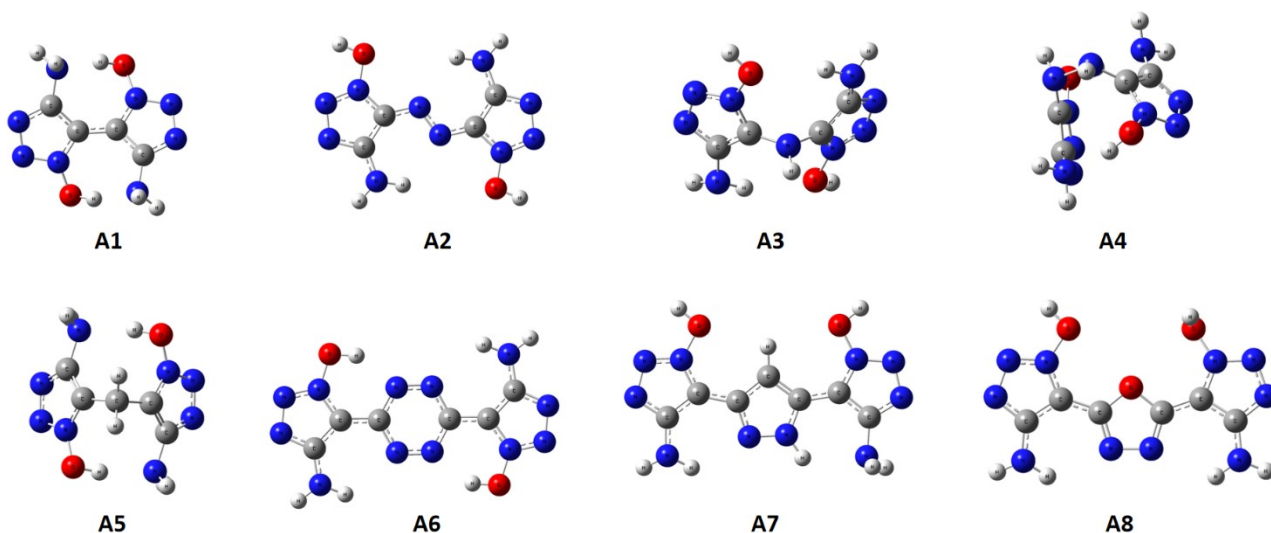

Figure S1 Optimized geometry of A series

---

\*Corresponding authors: Piao He, E-mail: piaohe@csu.edu.cn

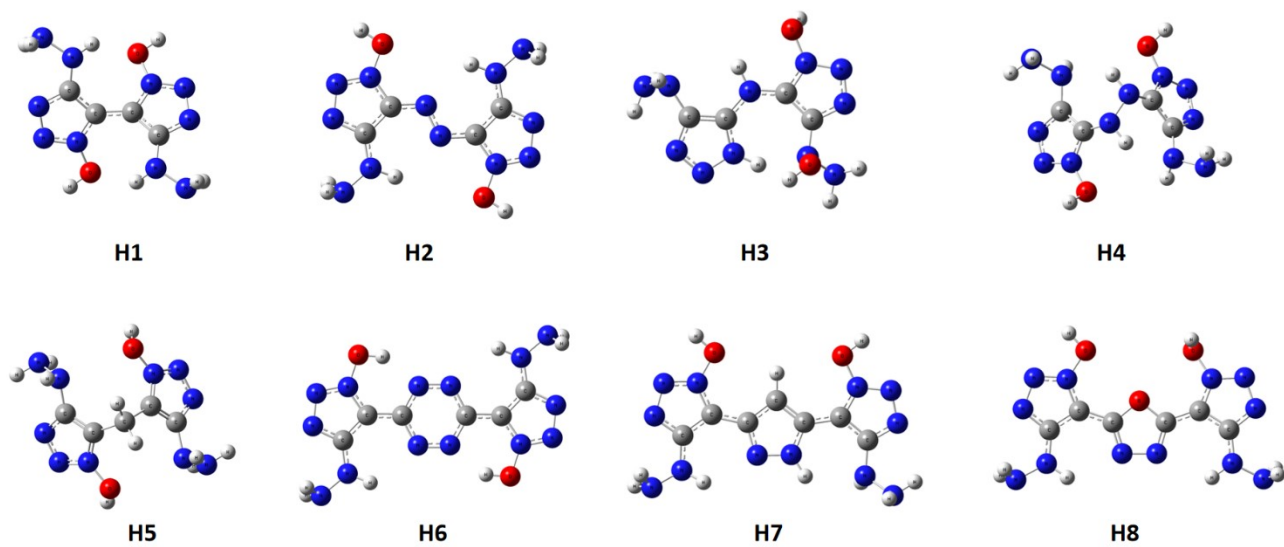

Figure S2 Optimized geometry of H series

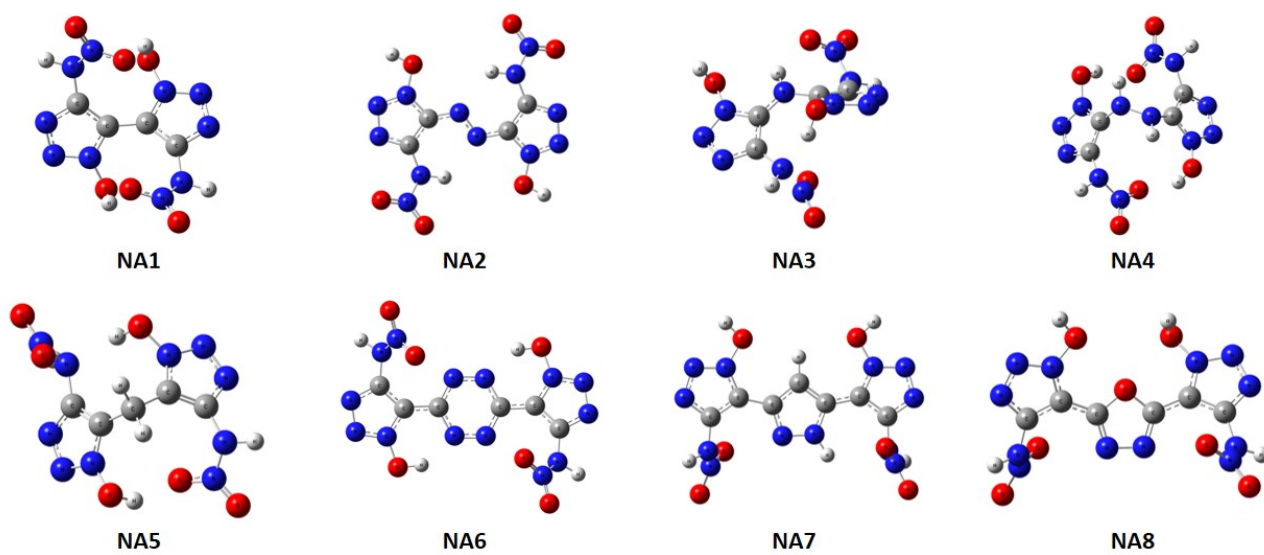

Figure S3 Optimized geometry of NA series

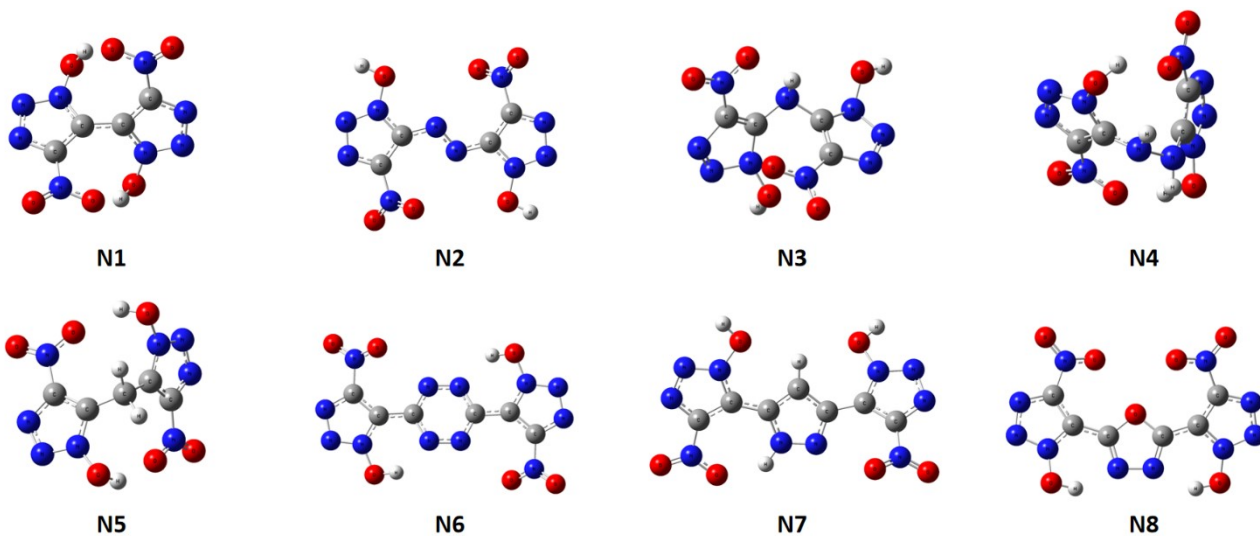

Figure S4 Optimized geometry of N series

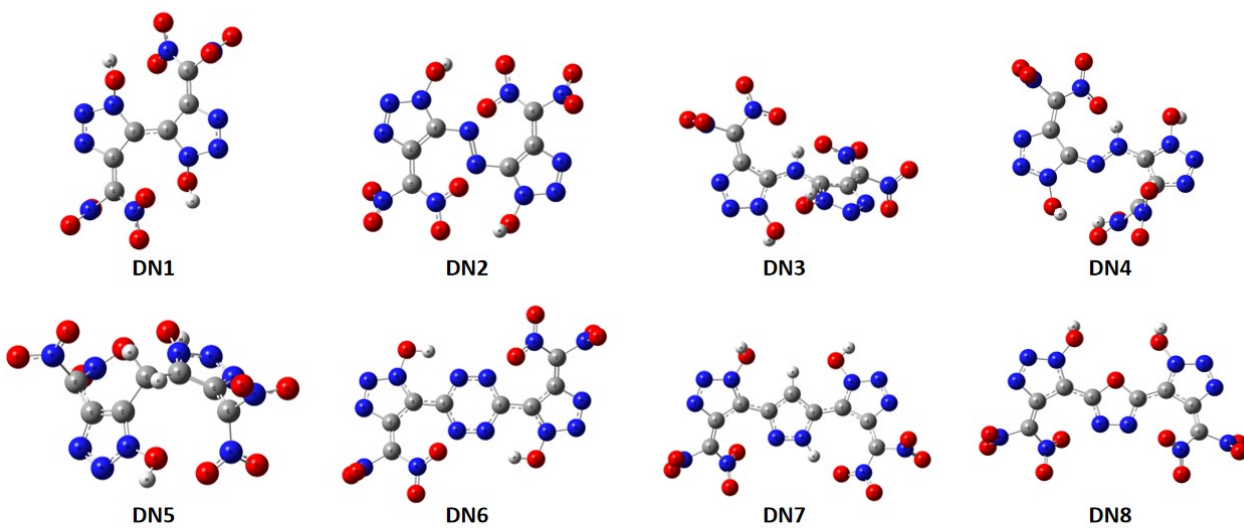

Figure S5 Optimized geometry of DN series

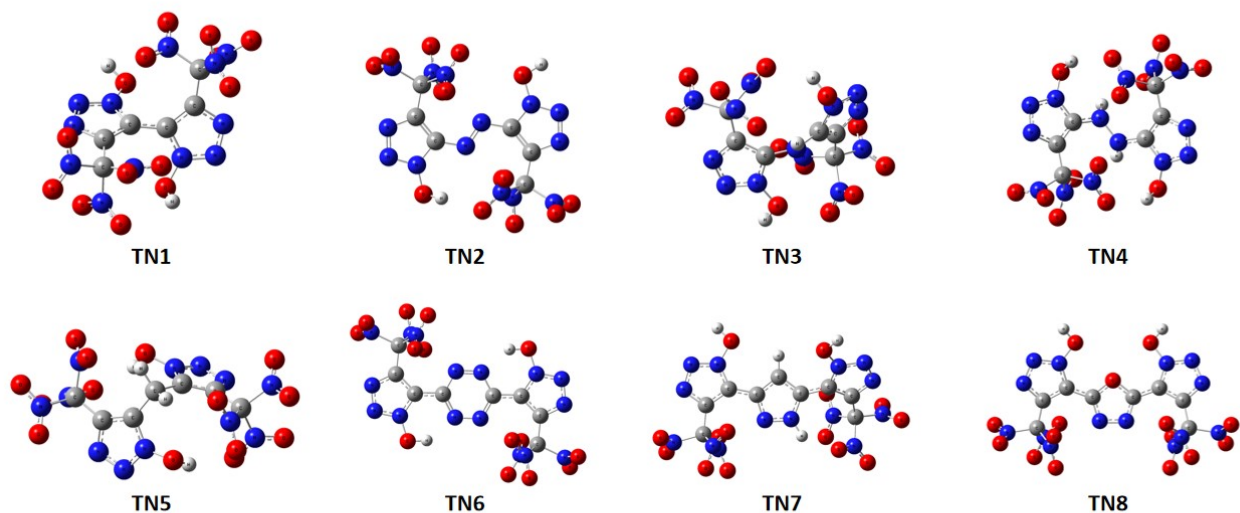

Figure S6 Optimized geometry of TN series

## 2. HOMO-LUMO orbitals and energy gap

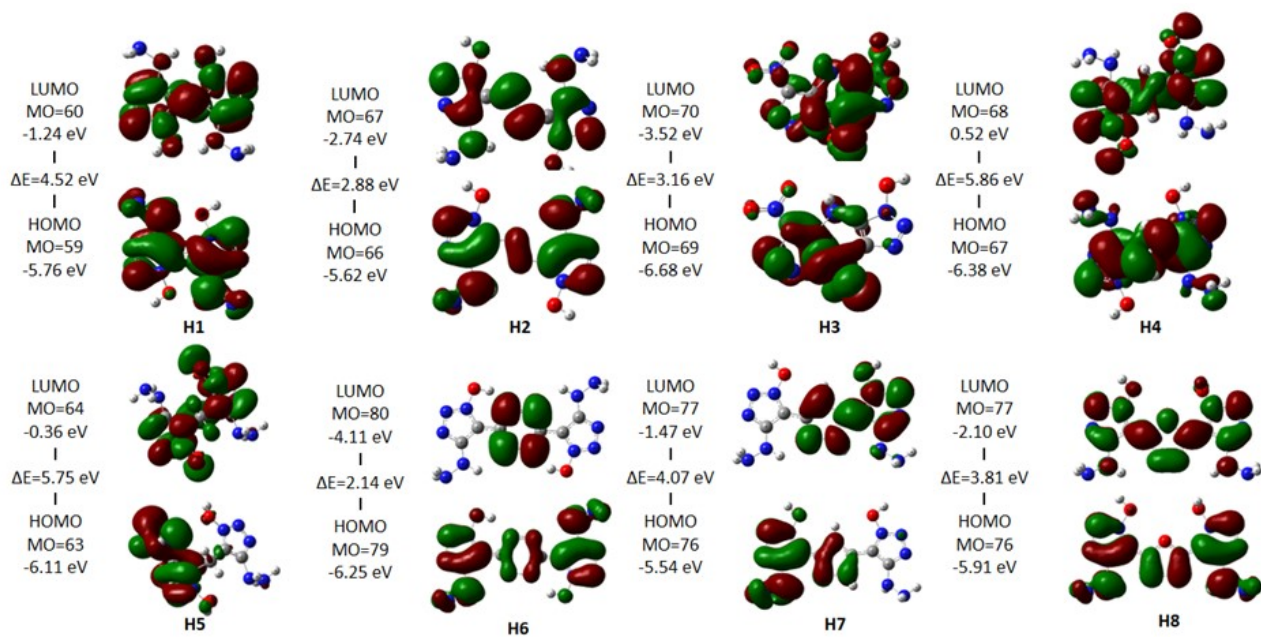

Figure S7 HOMO-LUMO energy and HOMO-LUMO gap of H series



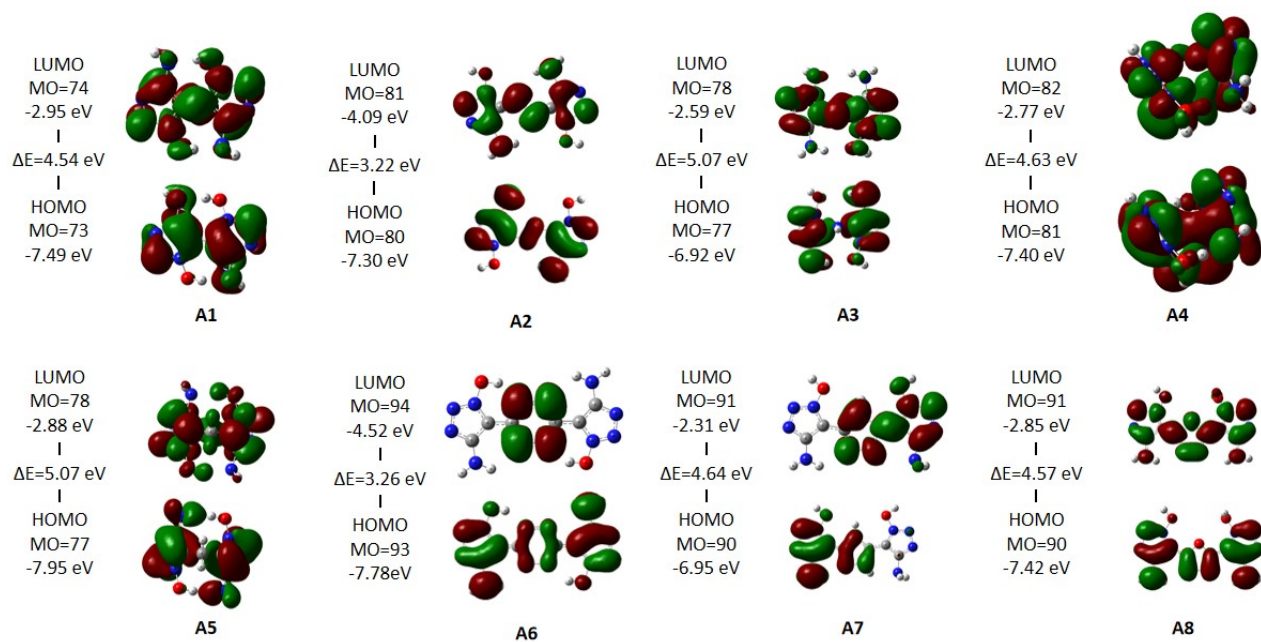

Figure S8 HOMO-LUMO energy and HOMO-LUMO gap of A series

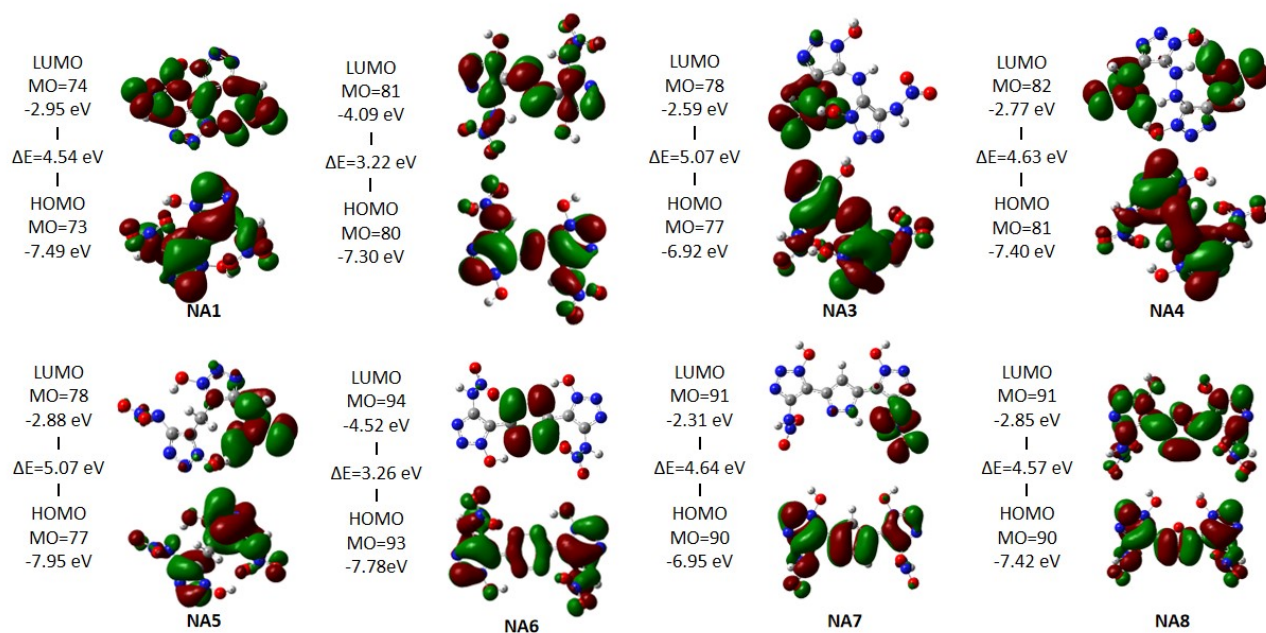

Figure S9 HOMO-LUMO energy and HOMO-LUMO gap of NA series

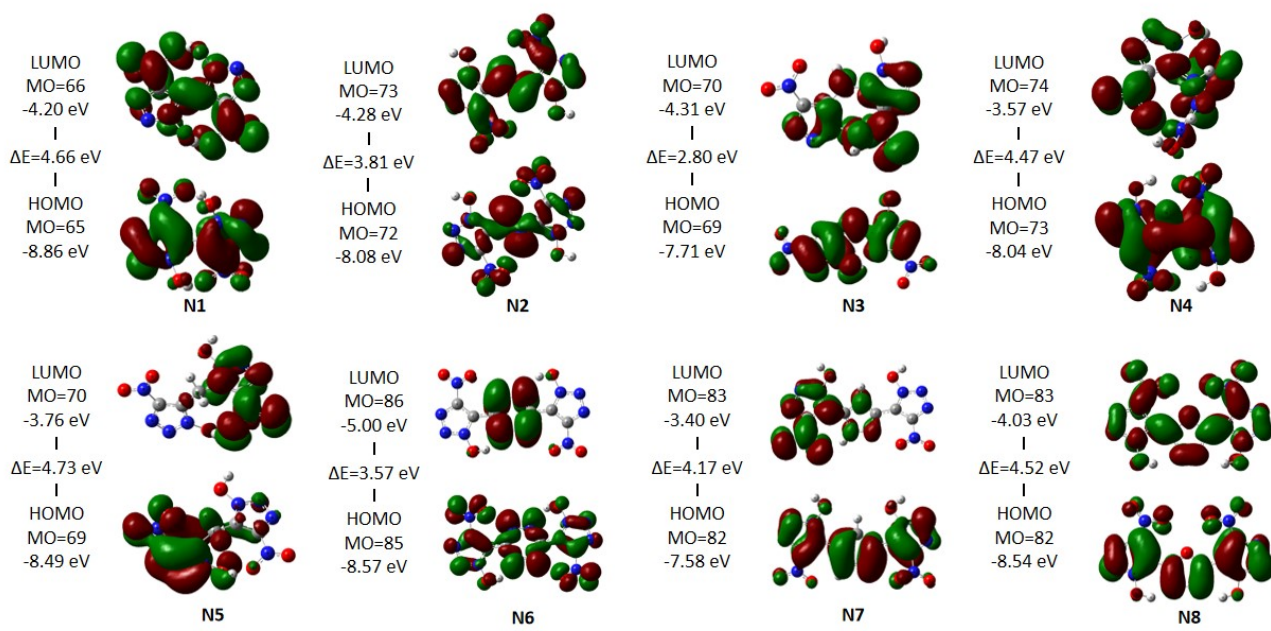

Figure S10 HOMO-LUMO energy and HOMO-LUMO gap of N series

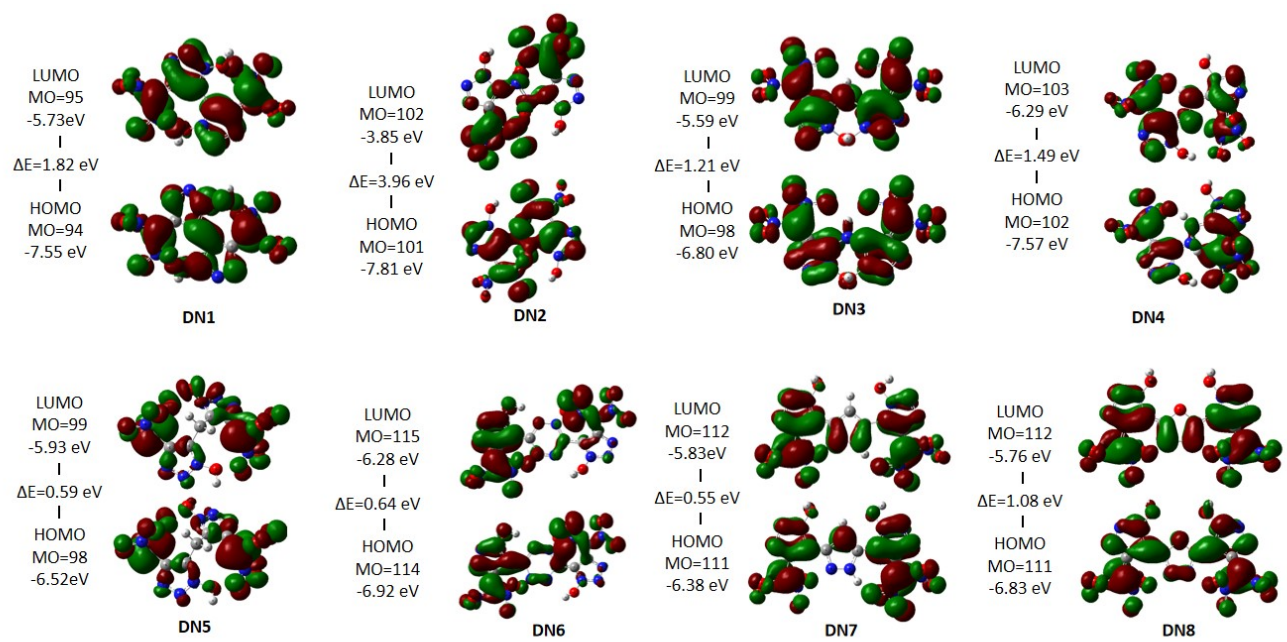

Figure S11 HOMO-LUMO energy and HOMO-LUMO gap of DN series

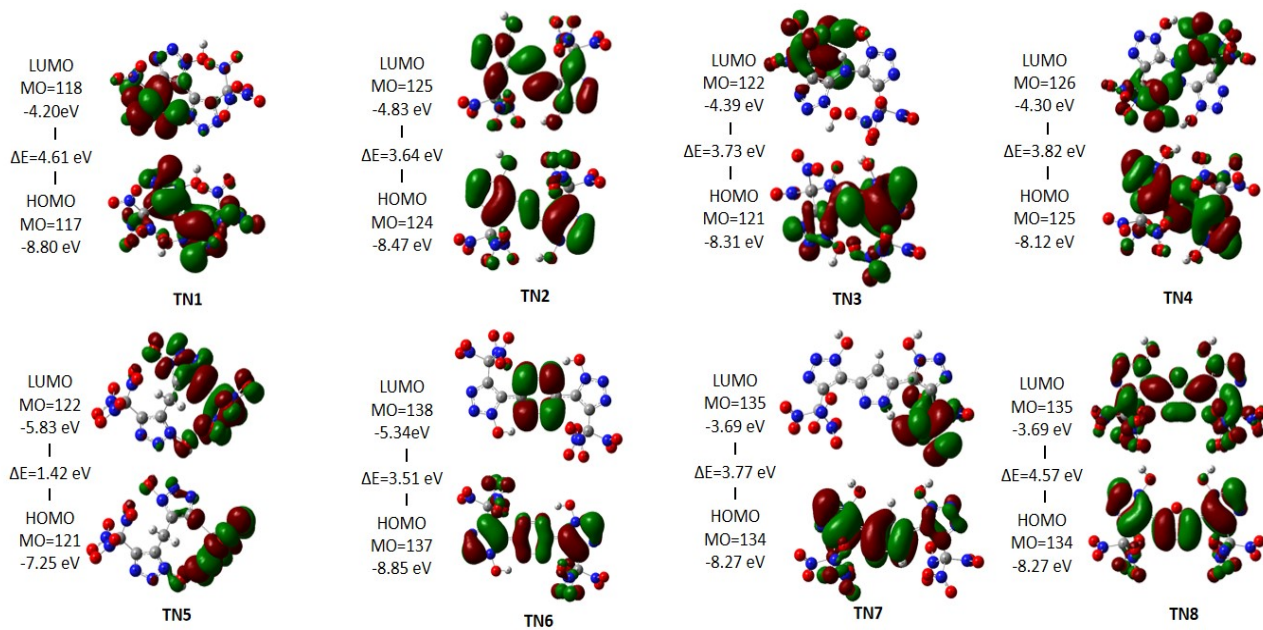

Figure S12 HOMO-LUMO energy and HOMO-LUMO gap of TN series



### 3. Molecular electrostatic potential (ESP)

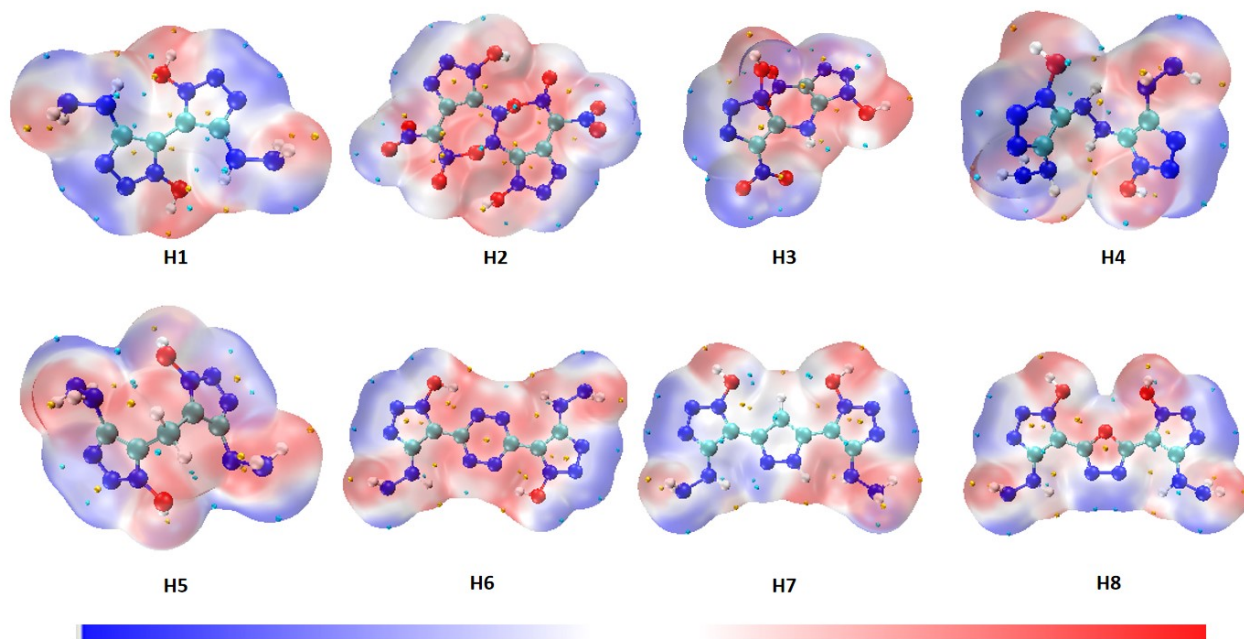

Figure S13 Molecular electrostatic potential of  $-\text{NHNH}_2(\text{H})$  series ranging from  $-0.03$  a.u.(blue) to  $0.03$  a.u.(red),  
isosurface=0.001

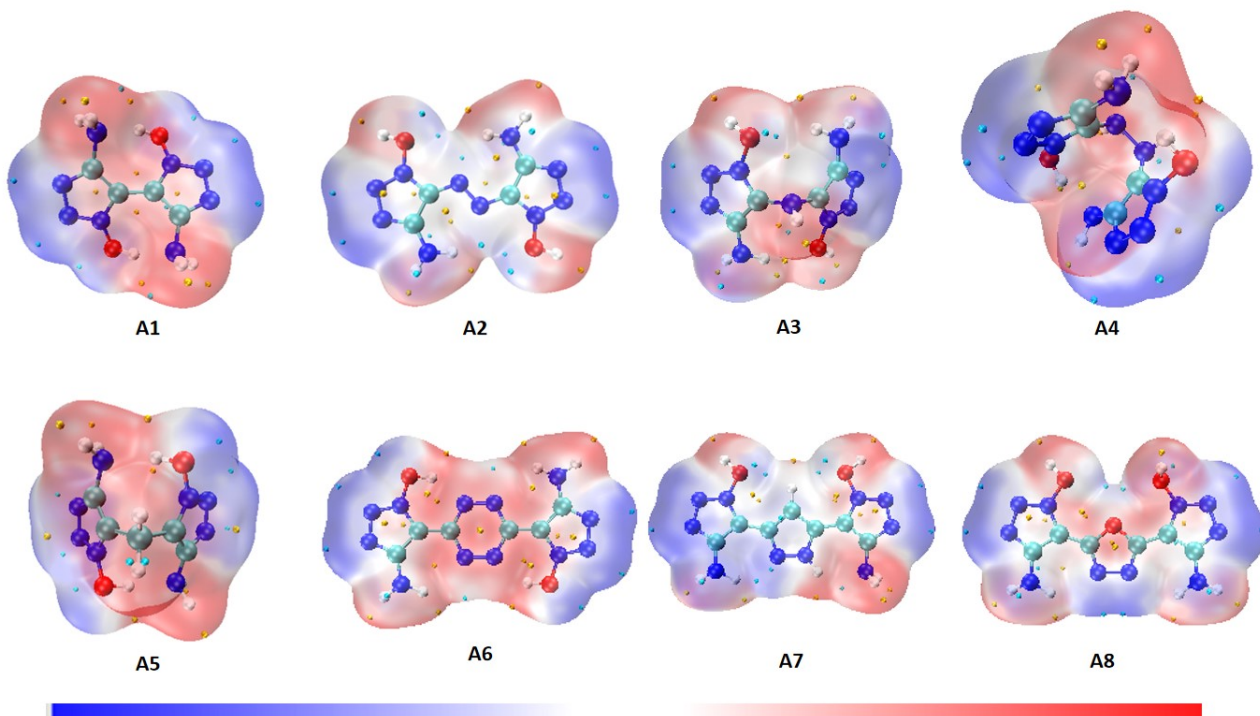

Figure S14 Molecular electrostatic potential of  $-\text{NH}_2(\text{A})$  series ranging from  $-0.03$  a.u.(blue) to  $0.03$  a.u.(red),  
isosurface=0.001



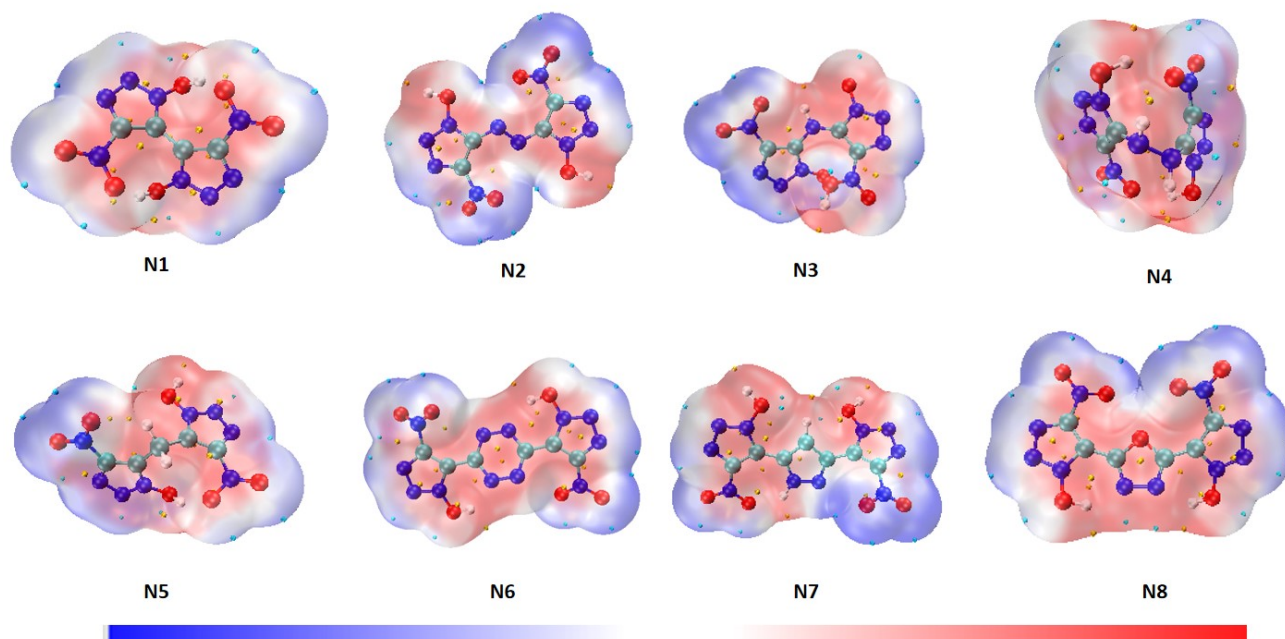

**Figure S15** Molecular electrostatic potential of  $-\text{NO}_2(\text{N})$  series ranging from -0.03 a.u.(blue) to 0.03 a.u.(red),  
 isosurface=0.001

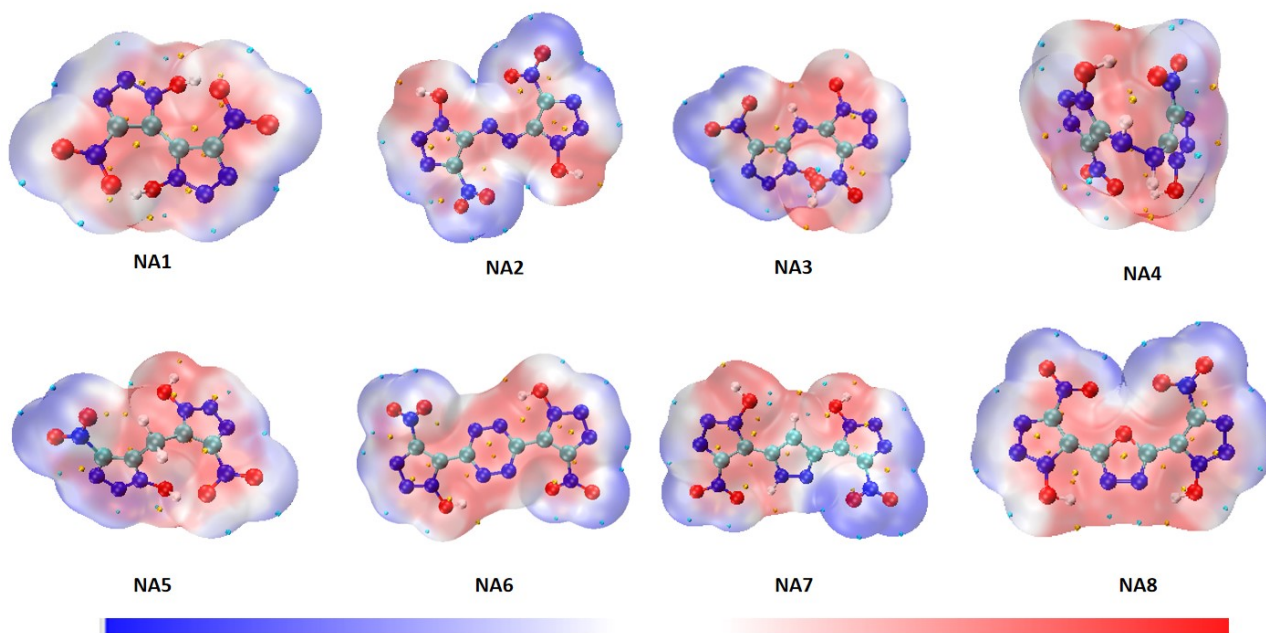

**Figure S16** Molecular electrostatic potential of  $-\text{NHNO}_2(\text{NA})$  series ranging from -0.03 a.u.(blue) to 0.03 a.u.(red),  
 isosurface=0.001

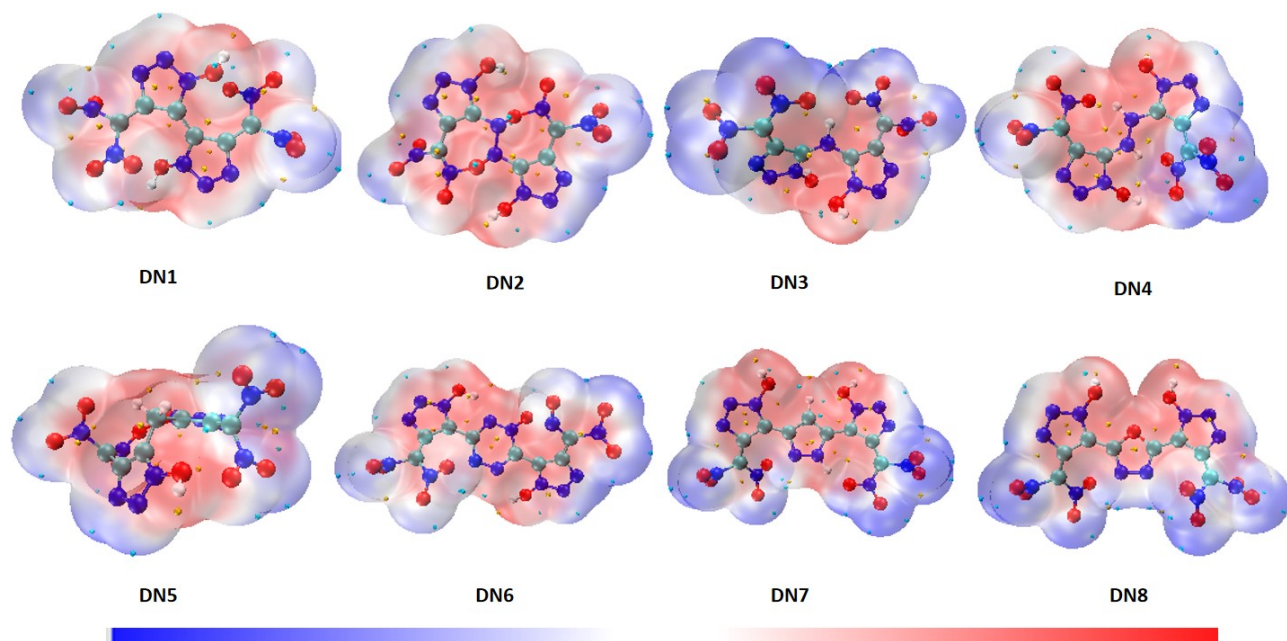

**Figure S17** Molecular electrostatic potential of  $-\text{C}(\text{NO}_2)_2$  (DN) series ranging from  $-0.03$  a.u.(blue) to  $0.03$  a.u.(red), isosurface= $0.001$

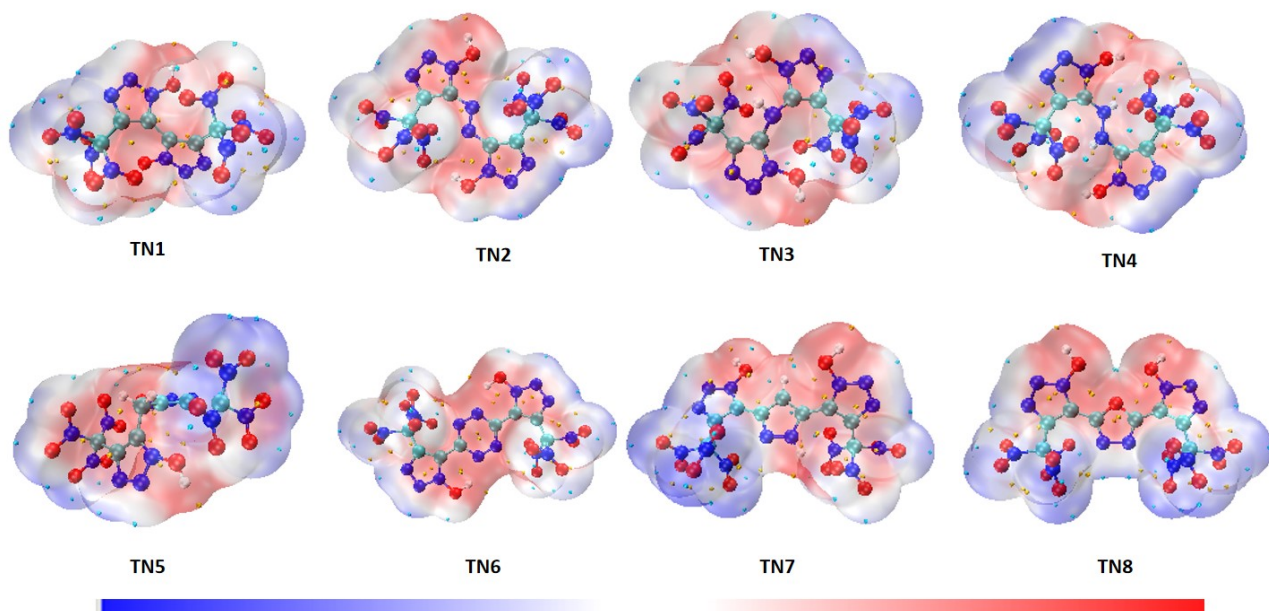

**Figure S18** Molecular electrostatic potential of  $-\text{C}(\text{NO}_2)_3$  (TN) series ranging from  $-0.03$  a.u.(blue) to  $0.03$  a.u.(red), isosurface= $0.001$

#### 4. Thermodynamic parameters

**Table. S1** 48 substituted 1,2,3-triazole-N-oxides, their sum of electronic and zero-point energy (  $E_0$  ), thermal correction from 0K to 298K (  $H_T$  ), gas-phase heat of formation under 0K (  $\text{HOF}_{(g,0K)}$  ), gas-phase heat of formation under 298K (  $\text{HOF}_{(g,298K)}$  ), condensed-phase heat of formation under 298K (  $\text{HOF}_{(c,298K)}$  ), compared with HMX and RDX.

| No. | Formula                                                       | $E_0$ (a.u.) | $H_T$  | $\text{HOF}_{(g,0K)}$ | $\text{HOF}_{(g,298K)}$ | $\text{HOF}_{(c,298K)}$ |
|-----|---------------------------------------------------------------|--------------|--------|-----------------------|-------------------------|-------------------------|
|     |                                                               | 6-311G(d,p)  | (a.u.) | (kJ/mol)              | (kJ/mol)                | (kJ/mol)                |
| A1  | C <sub>4</sub> H <sub>6</sub> N <sub>8</sub> O <sub>2</sub>   | -744.3836    | 0.0121 | 556.58                | 515.31                  | 407.13                  |
| A2  | C <sub>4</sub> H <sub>6</sub> N <sub>10</sub> O <sub>2</sub>  | -853.8553    | 0.0159 | 777.03                | 737.05                  | 609.78                  |
| A3  | C <sub>4</sub> H <sub>7</sub> N <sub>9</sub> O <sub>2</sub>   | -799.7129    | 0.0154 | 643.38                | 602.22                  | 480.74                  |
| A4  | C <sub>4</sub> H <sub>8</sub> N <sub>10</sub> O <sub>2</sub>  | -855.0447    | 0.0140 | 723.37                | 670.04                  | 548.65                  |
| A5  | C <sub>4</sub> H <sub>8</sub> N <sub>8</sub> O <sub>2</sub>   | -783.6766    | 0.0133 | 563.86                | 516.30                  | 401.28                  |
| A6  | C <sub>6</sub> H <sub>6</sub> N <sub>12</sub> O <sub>2</sub>  | -1039.5681   | 0.0176 | 1030.74               | 984.59                  | 847.35                  |
| A7  | C <sub>7</sub> H <sub>8</sub> N <sub>10</sub> O <sub>2</sub>  | -969.4000    | 0.0180 | 789.61                | 743.49                  | 597.12                  |
| A8  | C <sub>6</sub> H <sub>6</sub> N <sub>10</sub> O <sub>3</sub>  | -1005.3304   | 0.0178 | 667.02                | 625.67                  | 487.56                  |
| H1  | C <sub>4</sub> H <sub>6</sub> N <sub>10</sub> O <sub>2</sub>  | -1153.4359   | 0.0174 | 693.33                | 648.38                  | 527.47                  |
| H2  | C <sub>4</sub> H <sub>6</sub> N <sub>12</sub> O <sub>2</sub>  | -1262.8989   | 0.0204 | 936.72                | 891.02                  | 753.75                  |
| H3  | C <sub>4</sub> H <sub>9</sub> N <sub>11</sub> O <sub>2</sub>  | -1208.7895   | 0.0188 | 716.29                | 666.57                  | 531.21                  |
| H4  | C <sub>4</sub> H <sub>10</sub> N <sub>12</sub> O <sub>2</sub> | -1264.1121   | 0.0195 | 820.53                | 764.02                  | 620.97                  |
| H5  | C <sub>5</sub> H <sub>6</sub> N <sub>10</sub> O <sub>2</sub>  | -1192.7469   | 0.0183 | 653.29                | 601.25                  | 468.40                  |
| H6  | C <sub>6</sub> H <sub>8</sub> N <sub>14</sub> O <sub>2</sub>  | -1448.6179   | 0.0216 | 1174.01               | 1120.58                 | 971.04                  |
| H7  | C <sub>7</sub> H <sub>10</sub> N <sub>12</sub> O <sub>2</sub> | -1378.4630   | 0.0225 | 898.25                | 846.48                  | 686.23                  |
| H8  | C <sub>6</sub> H <sub>8</sub> N <sub>12</sub> O <sub>3</sub>  | -1414.3777   | 0.0223 | 816.92                | 769.60                  | 616.58                  |
| N1  | C <sub>4</sub> H <sub>2</sub> N <sub>8</sub> O <sub>6</sub>   | -1042.7257   | 0.0146 | 655.74                | 620.66                  | 520.77                  |
| N2  | C <sub>4</sub> H <sub>2</sub> N <sub>10</sub> O <sub>6</sub>  | -1152.1600   | 0.0181 | 974.29                | 939.62                  | 808.31                  |
| N3  | C <sub>4</sub> H <sub>3</sub> N <sub>9</sub> O <sub>6</sub>   | -1098.0263   | 0.0175 | 817.55                | 781.46                  | 657.05                  |
| N4  | C <sub>4</sub> H <sub>4</sub> N <sub>10</sub> O <sub>6</sub>  | -1153.3958   | 0.0168 | 798.51                | 752.09                  | 634.49                  |
| N5  | C <sub>5</sub> H <sub>4</sub> N <sub>8</sub> O <sub>6</sub>   | -1082.0204   | 0.0168 | 658.47                | 619.55                  | 493.11                  |
| N6  | C <sub>6</sub> H <sub>2</sub> N <sub>12</sub> O <sub>6</sub>  | -1337.8724   | 0.0196 | 1228.76               | 1187.26                 | 1041.45                 |
| N7  | C <sub>7</sub> H <sub>4</sub> N <sub>10</sub> O <sub>6</sub>  | -1267.7344   | 0.0200 | 908.88                | 867.70                  | 710.86                  |
| N8  | C <sub>6</sub> H <sub>2</sub> N <sub>10</sub> O <sub>7</sub>  | -1303.6514   | 0.0189 | 821.32                | 782.35                  | 640.72                  |

|            |                      |            |        |         |         |                     |
|------------|----------------------|------------|--------|---------|---------|---------------------|
| <b>NA1</b> | $C_4H_4N_{10}O_6$    | -1153.4045 | 0.0174 | 775.74  | 730.78  | 615.81              |
| <b>NA2</b> | $C_4H_4N_{12}O_6$    | -1262.8634 | 0.0204 | 1029.84 | 984.14  | 831.56              |
| <b>NA3</b> | $C_4H_5N_{11}O_6$    | -1208.7606 | 0.0188 | 792.04  | 742.32  | 608.54              |
| <b>NA4</b> | $C_4H_6N_{12}O_6$    | -1264.0762 | 0.0195 | 914.58  | 858.07  | 719.27              |
| <b>NA5</b> | $C_5H_6N_{10}O_6$    | -1192.7150 | 0.0183 | 737.20  | 685.16  | 554.53              |
| <b>NA6</b> | $C_6H_4N_{14}O_6$    | -1448.5791 | 0.0216 | 1275.71 | 1222.28 | 1062.66             |
| <b>NA7</b> | $C_7H_6N_{12}O_6$    | -1378.4245 | 0.0225 | 999.41  | 947.64  | 776.84              |
| <b>NA8</b> | $C_6H_4N_{12}O_7$    | -1414.3378 | 0.0223 | 921.55  | 874.23  | 706.55              |
| <b>DN1</b> | $C_6H_2N_{10}O_{10}$ | -1529.0888 | 0.0231 | 1085.80 | 1044.72 | 905.36              |
| <b>DN2</b> | $C_6H_2N_{12}O_{10}$ | -1638.5073 | 0.0239 | 1445.58 | 1397.89 | 1246.01             |
| <b>DN3</b> | $C_6H_3N_{11}O_{10}$ | -1584.4582 | 0.0248 | 1067.12 | 1022.09 | 854.93              |
| <b>DN4</b> | $C_6H_4N_{12}O_{10}$ | -1639.8157 | 0.0260 | 1079.75 | 1029.21 | 850.16              |
| <b>DN5</b> | $C_7H_4N_{10}O_{10}$ | -1568.3879 | 0.0253 | 1076.93 | 1032.23 | 872.36              |
| <b>DN6</b> | $C_8H_2N_{14}O_{10}$ | -1824.2383 | 0.0269 | 1651.52 | 1600.90 | 1399.51             |
| <b>DN7</b> | $C_9H_4N_{12}O_{10}$ | -1754.1045 | 0.0279 | 1320.59 | 1272.03 | 1064.54             |
| <b>DN8</b> | $C_8H_2N_{12}O_{11}$ | -1790.0139 | 0.0278 | 1253.03 | 1209.27 | 993.13              |
| <b>TN1</b> | $C_4H_2N_8O_6$       | -1939.4254 | 0.0293 | 919.72  | 868.90  | 702.26              |
| <b>TN2</b> | $C_4H_2N_{10}O_6$    | -2048.8958 | 0.0308 | 1143.63 | 1088.15 | 901.14              |
| <b>TN3</b> | $C_4H_3N_9O_6$       | -1994.7749 | 0.0302 | 953.40  | 896.34  | 722.76              |
| <b>TN4</b> | $C_4H_4N_{10}O_6$    | -2050.1105 | 0.0307 | 1023.38 | 959.12  | 777.53              |
| <b>TN5</b> | $C_5H_4N_8O_6$       | -1978.7337 | 0.0295 | 886.84  | 827.18  | 659.67              |
| <b>TN6</b> | $C_6H_2N_{12}O_6$    | -2234.6024 | 0.0328 | 1413.49 | 1352.40 | 1131.52             |
| <b>TN7</b> | $C_7H_4N_{10}O_6$    | -2164.4533 | 0.0334 | 1122.38 | 1062.07 | 829.69              |
| <b>TN8</b> | $C_6H_2N_{10}O_7$    | -2200.3644 | 0.0332 | 1050.46 | 994.70  | 771.95              |
| <b>RDX</b> | $C_3H_6N_6O_6$       | ---        | ---    | ---     | 192.00  | 79.00 <sup>1</sup>  |
| <b>HMX</b> | $C_4H_8N_8O_8$       | ---        | ---    | ---     | ---     | 102.41 <sup>1</sup> |

---



**Table. S2** 48 substituted 1,2,3-triazole derivatives, their predicted values of density  $\rho$ , oxygen balance OB(based on  $\text{CO}_2$ ), detonation energy Q, detonation velocity D, detonation pressure P, and  $\Delta V_{\text{Triaz}}$ , predicted values of impact sensitivities. h50, compared with HMX, CL-20 and RDX.

| No. | $\rho$<br>(g/cm <sup>3</sup> ) | OB<br>(%) | Q<br>(kcal/g) | D<br>(km/s) | P<br>(GPa) | $\Delta V_{\text{Triaz}}$<br>(cm <sup>3</sup> ) | h50<br>(cm) |
|-----|--------------------------------|-----------|---------------|-------------|------------|-------------------------------------------------|-------------|
| A1  | 1.73                           | -72.73    | 1.13          | 6.69        | 19.34      | 240.99                                          | 103.94      |
| A2  | 1.74                           | -63.72    | 1.20          | 6.66        | 19.26      | 272.96                                          | 58.47       |
| A3  | 1.71                           | -71.36    | 1.16          | 6.80        | 19.92      | 253.64                                          | 105.69      |
| A4  | 1.75                           | -70.18    | 1.18          | 7.02        | 21.46      | 263.03                                          | 107.24      |
| A5  | 1.67                           | -90.57    | 1.10          | 6.64        | 18.64      | 205.22                                          | 268.83      |
| A6  | 1.74                           | -74.82    | 1.18          | 6.20        | 16.71      | 236.80                                          | 64.78       |
| A7  | 1.71                           | -96.97    | 1.06          | 6.27        | 16.92      | 170.35                                          | 221.75      |
| A8  | 1.75                           | -72.18    | 1.09          | 7.31        | 23.29      | 223.29                                          | 78.19       |
| H1  | 1.67                           | -70.18    | 1.15          | 8.58        | 31.20      | 257.07                                          | 107.24      |
| H2  | 1.68                           | -62.50    | 1.24          | 9.08        | 35.03      | 289.46                                          | 64.31       |
| H3  | 1.69                           | -69.14    | 1.11          | 8.61        | 31.59      | 248.74                                          | 108.61      |
| H4  | 1.67                           | -68.22    | 1.15          | 8.71        | 32.22      | 262.75                                          | 109.84      |
| H5  | 1.64                           | -85.95    | 1.07          | 7.96        | 26.53      | 210.70                                          | 246.10      |
| H6  | 1.68                           | -72.73    | 1.20          | 8.95        | 34.11      | 249.81                                          | 69.42       |
| H7  | 1.67                           | -92.52    | 1.06          | 8.00        | 27.15      | 183.22                                          | 210.29      |
| H8  | 1.71                           | -70.27    | 1.12          | 8.51        | 31.13      | 239.36                                          | 82.44       |
| N1  | 1.85                           | -18.60    | 1.62          | 8.84        | 35.28      | 469.50                                          | 92.37       |
| N2  | 1.85                           | -16.78    | 1.70          | 9.03        | 36.83      | 491.45                                          | 59.30       |
| N3  | 1.95                           | -20.51    | 1.67          | 9.34        | 40.56      | 481.57                                          | 94.17       |
| N4  | 1.86                           | -22.22    | 1.58          | 8.95        | 36.26      | 457.03                                          | 95.81       |
| N5  | 1.84                           | -35.29    | 1.55          | 8.60        | 33.24      | 424.80                                          | 194.75      |
| N6  | 1.85                           | -33.14    | 1.60          | 8.63        | 33.58      | 427.35                                          | 64.35       |
| N7  | 1.86                           | -49.38    | 1.46          | 8.29        | 31.10      | 365.59                                          | 175.23      |
| N8  | 1.88                           | -29.45    | 1.51          | 8.60        | 33.69      | 415.26                                          | 75.02       |
| NA1 | 1.82                           | -22.22    | 1.57          | 8.78        | 34.41      | 452.87                                          | 95.81       |

|              |      |        |       |      |       |                     |        |
|--------------|------|--------|-------|------|-------|---------------------|--------|
| <b>NA2</b>   | 1.85 | -20.25 | 1.59  | 8.97 | 36.28 | 459.65              | 63.95  |
| <b>NA3</b>   | 1.82 | -23.76 | 1.50  | 8.86 | 35.39 | 434.20              | 97.31  |
| <b>NA4</b>   | 1.82 | -25.16 | 1.53  | 8.84 | 34.84 | 441.08              | 98.70  |
| <b>NA5</b>   | 1.77 | -37.09 | 1.48  | 8.40 | 31.01 | 406.25              | 187.26 |
| <b>NA6</b>   | 1.82 | -34.78 | 1.52  | 8.51 | 32.36 | 404.91              | 68.20  |
| <b>NA7</b>   | 1.79 | -49.72 | 1.41  | 8.12 | 29.16 | 355.61              | 170.98 |
| <b>NA8</b>   | 1.85 | -31.46 | 1.46  | 8.55 | 32.96 | 401.12              | 78.64  |
| <b>DN1</b>   | 1.87 | -12.83 | 1.86  | 9.21 | 38.45 | 548.60              | 43.11  |
| <b>DN2</b>   | 1.92 | -11.94 | 1.94  | 9.59 | 42.32 | 567.17              | 33.17  |
| <b>DN3</b>   | 1.90 | -14.40 | 1.78  | 9.25 | 39.16 | 523.25              | 45.01  |
| <b>DN4</b>   | 1.88 | -15.84 | 1.72  | 9.29 | 39.35 | 507.02              | 46.83  |
| <b>DN5</b>   | 1.88 | -24.74 | 1.80  | 9.10 | 37.72 | 513.52              | 74.77  |
| <b>DN6</b>   | 1.89 | -24.67 | 1.80  | 9.05 | 37.39 | 499.52              | 37.68  |
| <b>DN7</b>   | 1.88 | -36.36 | 1.70  | 8.74 | 34.74 | 455.70              | 77.46  |
| <b>DN8</b>   | 1.85 | -21.72 | 1.73  | 8.95 | 36.60 | 491.75              | 41.58  |
| <b>TN1</b>   | 1.92 | 3.43   | 1.80  | 9.63 | 42.80 | 565.65              | 20.51  |
| <b>TN2</b>   | 1.92 | 3.24   | 1.79  | 9.64 | 42.77 | 561.41              | 17.28  |
| <b>TN3</b>   | 1.93 | 1.66   | 1.76  | 9.65 | 43.02 | 554.07              | 21.73  |
| <b>TN4</b>   | 1.93 | 0.00   | 1.75  | 9.69 | 43.43 | 547.62              | 22.95  |
| <b>TN5</b>   | 1.89 | -6.67  | 1.74  | 9.27 | 39.26 | 535.52              | 32.71  |
| <b>TN6</b>   | 1.91 | -8.79  | 1.72  | 9.21 | 38.91 | 514.73              | 20.44  |
| <b>TN7</b>   | 1.90 | -18.05 | 1.65  | 9.01 | 37.17 | 482.88              | 36.52  |
| <b>TN8</b>   | 1.92 | -5.99  | 1.69  | 9.22 | 39.17 | 514.26              | 21.88  |
|              |      |        |       |      |       | 465.00 <sup>2</sup> |        |
| <b>RDX</b>   | 1.80 | -21.62 | 1.50  | 8.75 | 34.70 | 475.00 <sup>2</sup> | 37.5   |
|              |      |        |       |      |       | 480.00 <sup>2</sup> |        |
| <b>HMX</b>   | 1.90 | -21.62 | 1.498 | 9.10 | 39.30 | 450.00 <sup>2</sup> | 37.0   |
| <b>CL-20</b> | 2.04 | -10.93 | 1.36  | 9.46 | 46.7  | 372.39              | 13.00  |

---

## 6. References

1. J. S. P. Politzer; Murray, *Central European Journal of Energetic Materials*, 2011, 209-220.
2. M. K. Kamalvand, M. H.; Jafari, M., *Propellants, Explosives, Pyrotechnics*, 2015, **40**, 551-557.
